# Supplementary material for: Correlations Between Structural Brain Abnormalities, Cognition and Electroclinical Characteristics in Patients With Juvenile Myoclonic Epilepsy
Source: Front Neurol. 2022 May 16;13:883078. doi: 10.3389/fneur.2022.883078 (PMC9149597; doi:10.3389/fneur.2022.883078)
Supplement: Supplementary file 2 [file Table_2.docx]

**Supplementary Table 2.**

Correlation of neuropsychological tests’ scores with the volumes of brain regions with statistical differences in gray matter in JME.

| Neuropsychological test | OrG_L_6_6 | PrG_L_6_2 | PrG_L_6_4 | PCL_L_2_1 | PrG_R_6_1 | PoG_L_4_1 | PoG_R_4_1 | Tha_L_8_5 | Tha_L_8_7 | PCun_L_4_3 | PhG_R_6_4 |
| --- | --- | --- | --- | --- | --- | --- | --- | --- | --- | --- | --- |
|  | Pearson Correlation/ *P*-value | | | | | | | | | | |
| Raven's Standard Progressive Matrices | 0.231/0.059 | 0.235/0.055 | 0.147/0.235 | -0.08/0.522 | **.281*/0.021#** | 0.122/0.324 | 0.182/0.14 | **.439**/<0.001#** | **.420**/<0.001#** | 0.098/0.431 | **.246**/0.045#** |
| Visual Research Task | 0.102/0.410 | 0.117/0.346 | 0.183/0.138 | 0.165/0.182 | 0.073/0.555 | 0.159/0.199 | 0.009/0.944 | 0.16/0.195 | 0.18/0.145 | 0.222/0.07 | 0.076/0.54 |
| Visual Tracing Task | **.298*/0.014#** | 0.196/0.111 | **.341**/0.005#** | 0.237/0.054 | 0.229/0.062 | **.301*/0.013#** | 0.142/0.253 | 0.153/0.215 | 0.111/0.373 | 0.172/0.163 | 0.17/0.169 |
| AVLT Immediate Memory | 0.158/0.202 | 0.179/0.147 | 0.135/0.278 | 0.084/0.498 | **.347**/0.004#** | **.279*/0.022#** | **.270*/0.027#** | **.308*/0.011#** | 0.188/0.127 | 0.135/0.276 | 0.065/0.604 |
| AVLT Delayed Memory | 0.136/0.272 | 0.169/0.171 | 0.098/0.432 | 0.129/0.298 | 0.225/0.067 | **.251*/0.04#** | 0.173/0.161 | **.288*/0.018#** | 0.165/0.181 | 0.228/0.064 | 0.081/0.514 |
| Digit Span | 0.086/0.491 | 0.091/0.464 | 0.178/0.151 | 0.118/0.342 | 0.221/0.072 | 0.166/0.179 | **.305*/0.012#** | 0.222/0.071 | 0.173/0.161 | 0.104/0.402 | 0.115/0.356 |
| Digital n-back Test | 0.056/0.654 | 0.074/0.553 | 0.190/0.124 | 0.071/0.568 | 0.199/0.106 | 0.115/0.354 | 0.1/0.422 | **.311*/0.010#** | **.246*/0.045#** | -0.013/0.915 | 0.102/0.412 |
| Spatial n-back Test | **.403**/0.001#** | 0.188/0.127 | 0.223/0.070 | 0.139/0.260 | **.332**/0.006#** | **.383**/0.001#** | **.287*/0.018#** | **.293*/0.016#** | **.256*/0.037#** | **.327**/0.007#** | 0.231/0.06 |
| Choice Reaction Time | **-.426**/<.001#** | **-.378**/0.002#** | -0.128/0.304 | -0.135/0.276 | **-.271*/0.027#** | **-.295*/0.015#** | **-.248*/0.043#** | **-.358**/0.003#** | **-.367**/0.002#** | -0.15/0.227 | **-.289*/0.018#** |
| Visual Perception Task | 0.198/0.109 | 0.145/0.242 | 0.163/0.186 | 0.039/0.755 | 0.198/0.109 | 0.058/0.643 | 0.113/0.363 | 0.237/0.053 | 0.112/0.369 | 0.119/0.337 | 0.109/0.379 |
| Three-dimensional Mental Rotation | **.361**/0.003#** | **.318*/0.009#** | **.304*/0.012#** | **.291*/0.017#** | **.321**/0.008#** | **.332**/0.006#** | **.316**/0.009#** | **.426**/<0.001#** | **.385**/0.001#** | **.467**/<0.001#** | **.368**/0.002#** |
| Word Discrimination Test | 0.238/0.052 | **.283*/0.02#** | 0.066/0.597 | 0.16/0.196 | 0.204/0.098 | 0.171/0.167 | 0.097/0.434 | **.318**/0.009#** | **.284*/0.02#** | 0.232/0.059 | 0.21/0.089 |
| Complex Subtraction Test | 0.114/0.360 | 0.156/0.209 | 0.003/0.982 | 0.214/0.082 | **.289*/0.018#** | 0.15/0.226 | 0.147/0.234 | **.366**/0.002#** | **.330**/0.006#** | 0.203/0.099 | 0.165/0.181 |

*/**, Pearson Correlation; #, *P* < 0.05
